# Supplementary material for: Unveiling centromeric retrotransposon dynamics through a near-complete rye genome assembly
Source: Research Square preprint supplement (doi:10.21203/rs.3.rs-7013114/v1), 2025-07-08
Supplement: Supplementary file 2 [file 9f6b6c30a7128c80bdeb13d8.xlsx]

## Sheet: Supplementary Table 1 
Supplementary Table 1. Quality control of HiFi, ONT and Hi-C data.
HiFi and ONT
	num_seqs	sum_len	min_len	avg_len	max_len	N50	Q30(%)
HiFi1	5816790	95505843551	114	16419	54104	16381	94.67
HiFi2	4576975	77092101008	87	16843.5	47885	16896	94.17
HiFi3	4350341	94061325779	82	21621.6	65359	21457	92.75
In total	14744106	266659270338
ONT_duplexQ20_25K	1557677	65129094584	24800	41811.7	249109	42873	88
Hi-C
	num_seqs	sum_len	min_len	avg_len	max_len	N50	Q30(%)
HiC1_R1	133107888	13506481304	35	101.5	102	102	92.5	made in Rabanus-Wallace, M. T. et al. (2021)
HiC1_R2	133107888	13508245742	35	101.5	102	102	91.41	made in Rabanus-Wallace, M. T. et al. (2021)
HiC2_R1	137235909	13925461058	35	101.5	102	102	93.4	made in Rabanus-Wallace, M. T. et al. (2021)
HiC2_R2	137235909	13927260815	35	101.5	102	102	92.27	made in Rabanus-Wallace, M. T. et al. (2021)
HiC3_R1	192451454	21258034919	35	110.5	111	111	94.96	new data in this paper
HiC3_R2	192451454	21258730147	35	110.5	111	111	93.47	new data in this paper
HiC4_R1	176553415	19502321022	35	110.5	111	111	94.39	new data in this paper
HiC4_R2	176553415	19502863364	35	110.5	111	111	93.26	new data in this paper

## Sheet: Supplementary Table 2 
Supplementary Table 2. Summary of input data and parameters of the resulting OGM assembly.
Raw molecules filtered (>150 kbp)	Total length	1500 Gbp
	Molecule N50	231 kbp
	Molecule coverage	190x, 7.9 Gb, Lo7 genome size was estimated by flow cytometry.
OGM assembly	No. of contigs	556
	Total length	6.69 Gbp
	Contig N50	99.6 Mbp

## Sheet: Supplementary Table 3 
Supplementary Table 3. Comparison of chromosome lengths between Lo7_V2 and Lo7_V3 assemblies.
	Lo7_V2	Lo7_V3	Increase
chr1R (Mb)	727.34	775.56	48.22, 6.6%
chr2R (Mb)	946	1011.42	65.42, 6.9%
chr3R (Mb)	965.75	1128.39	162.64, 16.8%
chr4R (Mb)	906.46	973.44	66.98, 7.4%
chr5R (Mb)	876.15	924.46	48.31, 5.5%
chr6R (Mb)	885.15	943.69	58.54, 6.6%
chr7R (Mb)	899.93	920.15	20.22, 2.2%

## Sheet: Supplementary Table 4 
Supplementary Table 4. LAI scores for each chromosome of the Lo7_V3 genome assembly.
Chromosome	LAI
1R	23.97
2R	24.51
3R	19.81
4R	21.75
5R	24.48
6R	25.42
7R	24.35
Average	23.47

## Sheet: Supplementary Table 5 
Supplementary Table 5. Gene annotation comparison between Lo7_V2 and Lo7_V3.
All_genes	Lo7_V2	Lo7_V3
Complete BUSCOs (C)	1588, 98.4%	1597, 98.9%
Complete and single-copy BUSCOs (S)	1477, 91.5%	1135, 70.3%
Complete and duplicated BUSCOs (D)	111, 6.9%	462, 28.6%
Fragmented BUSCOs (F)	17, 1.1%	3, 0.2%
Missing BUSCOs (M)	9, 0.5%	14, 0.9%
Total BUSCO groups searched	1614	1614

## Sheet: Supplementary Table 6
Supplementary Table 6. Repeats annotation summary using EDTA.
Repeat Classes	Count	bpMasked	%masked
LINE_L1	46683	34691725	0.0052
LINE_RTE	5455	1775160	0.0003
LTR_Copia	382168	439488374	0.0658
LTR_Gypsy	1647061	2473507589	0.3704
LTR_unknown	1514977	1413740203	0.2117
TIR_CACTA	206499	125813027	0.0188
TIR_Mutator	175609	70320857	0.0105
TIR_PIF_Harbinger	159226	67363316	0.0101
TIR_Tc1_Mariner	322980	95851720	0.0144
TIR_hAT	57243	20184661	0.003
Helitron	645525	274525475	0.0411
Repeat_fragment	1252028	949634371	0.1422
Total interspersed	6415454	5966896478	0.8936

## Sheet: Supplementary Table 7
Supplementary Table 7. Quality control of CENH3 ChIP-seq short reads.
	num_seqs	sum_len	avg_len	N50	Q30(%)
CRR828114_f1	33963263	5094489450	150	150	94.32	ChIP1	Data downloaded from Liu et al. (2024)
CRR828114_r2	33963263	5094489450	150	150	94.07	ChIP1	Data downloaded from Liu et al. (2024)
CRR828115_f1	35710846	5356626900	150	150	92.83	ChIP2	Data downloaded from Liu et al. (2024)
CRR828115_r2	35710846	5356626900	150	150	91.18	ChIP2	Data downloaded from Liu et al. (2024)
CRR828116_f1	32512767	4876915050	150	150	93.99	Input1	Data downloaded from Liu et al. (2024)
CRR828116_r2	32512767	4876915050	150	150	93.86	Input1	Data downloaded from Liu et al. (2024)
CRR828117_f1	41349265	6202389750	150	150	93.54	Input2	Data downloaded from Liu et al. (2024)
CRR828117_r2	41349265	6202389750	150	150	93.05	Input2	Data downloaded from Liu et al. (2024)

## Sheet: Supplementary Table 8
Supplementary Table 8. Length prediction of seven complete rye centromeres.
Centromeres	Position, length
1R	296.2 - 306.2 Mb, 10.0 Mb
2R	440.5 - 452.5 Mb, 12.0 Mb
3R	525.1 - 537.1 Mb, 12.0 Mb
4R	383.5 - 394.9 Mb, 11.4 Mb
5R	286.6 - 298.0 Mb, 11.4 Mb
6R	308.4 - 319.0 Mb, 10.6 Mb
7R	436.5 - 448.5 Mb, 12.0 Mb

## Sheet: Supplementary Table 9
Supplementary Table 9. RNA-seq quantification of eleven genes located within centromeric regions.
	Chromosome	HC genes	Position	Predicted protein domains from NCBI	Whole root_3-leaf stage	Whole aerial organs_3-leaf stage	Whole aerial organs_3-leaf stage 2 hours after dusk	Complete spike	Flag leaf	Whole grains
1	1R	S.CEREALE.LO7.r2.1RG00031050.1	1A, 235.03 Mb	Triticum dicoccoides tobamovirus multiplication protein 2A-like (LOC119267329)	179.05	108.75	113.67	134.41	119.8	108.9
2	1R	S.CEREALE.LO7.r2.1RG00031080.1	1A, 243.16 Mb	Triticum dicoccoides translation initiation factor eIF-2B subunit beta-like (LOC119267477)	43.75	24.48	22.73	40	26.98	26.63
3	2R	S.CEREALE.LO7.r2.2RG00129220.1	2A, 370.42 Mb	Triticum aestivum indole-3-acetaldehyde oxidase-like (LOC123188694)	6.22	5.34	7.51	6.54	22.57	11.57
4	2R	S.CEREALE.LO7.r2.2RG00129230.1	2A, 373.41 Mb	Triticum dicoccoides CRIB domain-containing protein RIC7-like (LOC119359378)	0	0.01	0.06	113.97	0.86	0.08
5	3R	S.CEREALE.LO7.r2.3RG00245880.1	3A, 328.05 Mb	Triticum aestivum RAB11-binding protein RELCH-like (LOC123061248)	47.41	17.55	14.02	37.19	15.08	22.27
6	3R	S.CEREALE.LO7.r2.3RG00245890.1	3D, 235.05 Mb	Triticum aestivum neutral/alkaline invertase 1, mitochondrial-like (LOC123078300)	18.96	23.7	77.14	19.89	34.33	7.19
7	5R	S.CEREALE.LO7.r2.5RG00448320.1	5, 157.30 Mb	Triticum urartu serine/threonine-protein kinase D6PK-like (LOC125508257)	8.54	4.9	2.91	8.35	1.48	5.34
8	5R	S.CEREALE.LO7.r2.5RG00448340.1	5B, 196.49 Mb	Triticum dicoccoides ubiquitin carboxyl-terminal hydrolase 12-like (LOC119308058)	70.68	29.77	21.77	54.81	44.88	31.41
9	5R	S.CEREALE.LO7.r2.5RG00448350.1	5B, 178.97 Mb	Triticum aestivum E3 ubiquitin-protein ligase UPL2-like (LOC123110957)	56.93	21.56	25.15	56.72	47.83	47.98
10	7R	S.CEREALE.LO7.r2.7RG00701040.1	7A, 347.79 Mb	Triticum aestivum uncharacterized LOC123154596 (LOC123154596)	49.36	33.12	32.88	26.11	37.38	24.88
11	7R	S.CEREALE.LO7.r2.7RG00701070.1	7B, 318.95 Mb	Triticum aestivum sugar transport protein MST5 (LOC123160797)	0.05	0.06	0.03	111.22	0.57	0.16

## Sheet: Supplementary Table 10
Supplementary Table 10. Comparison of inversion number, maximum size, and average size between rye and wheat accessions.
	Weining vs. Lo7_V3	Lo7_V3 vs. Z8425B	Z8425B vs. HD6172
Num_Inversion	91	29	1
Max_Inversion	10676676	7806654	1473975
Avg_Inversion	573780	534159	1473975

[truncated: 1 more sheets: Supplementary Table 11]
